# Supplementary material for: Hypofractionated versus conventional intensity-modulated radiation irradiation (HARVEST-adjuvant): study protocol for a randomised non-inferior multicentre phase III trial
Source: HighWire-hosted journal article supplement (doi:10.1136/bmjopen-2022-062034), 2022-09-01
Supplement: bmjopen-2022-062034supp003_data_supplement.pdf [file bmjopen-2022-062034supp003_data_supplement.pdf]

版本号: Version 1.4, 2021-01-04

# 乳腺癌术后区域淋巴结大分割对比常规分割一体化 IMRT 的多中心、随机对照 III 期临床研究 知情同意书·知情告知页

医院: \_\_\_\_\_ 研究者姓名: \_\_\_\_\_

病人姓名: \_\_\_\_\_ 病人编号: \_\_\_\_\_

亲爱的患者:

您的医生已经确诊您患有乳腺癌,将会接受包括内乳淋巴结在内的区域淋巴结放疗。

我们将邀请您参加一项“乳腺癌术后区域淋巴结大分割对比常规分割一体化 IMRT 的多中心、随机对照 III 期临床研究”,以评估联合区域淋巴结(包含内乳淋巴结)大分割放疗与常规分割放疗在乳腺癌术后患者中的疗效和不良反应。

在您决定是否参加这项研究之前,请尽可能仔细阅读以下内容,它可以帮助您了解该项研究以及为何要进行这项研究,研究的程序和期限,参加研究后可能给您带来的益处、风险和不适。如果您愿意,您也可以和您的亲属、朋友一起讨论,或者请您的医生给予解释,帮助您做出决定。

## 一、研究背景和研究目的:

全国肿瘤登记中心发布的年报显示,乳腺癌已经位列我国女性恶性肿瘤发病率首位,其死亡率也位居前列,严重威胁我国女性健康。放射治疗是乳腺癌的主要治疗手段,可显著降低术后复发和死亡风险。尽管乳腺癌术后放疗的疗效确切,但是传统放疗(50Gy/25次,2Gy/次/天,每周5次;保乳瘤床加量10-16Gy/5-8次)的疗程长达5-7周,需要患者每天往返医院或者进行长时间的住院治疗。这给患者带来了巨大的时间成本和包括治疗费用、护理费用、交通费用等在内的沉重经济压力,严重影响患者及其家庭的正常生活。另外,在全球范围内放射治疗设备短缺均是影响患者从放射治疗手段中获益的重要障碍,中国作为发展中国家的放射治疗设备短缺情况更为突出。而长达5-7周的治疗疗程使单个乳腺癌术后放疗患者对放射治疗设备的累积占用时间过长,进一步加剧了放射治疗设备短缺的现状。

大分割放疗是一种在与常规分割模式下的放疗总剂量生物等效的前提下,通过增加单次照射剂量(>2Gy/次),减少实际放疗总剂量,从而缩短治疗疗程的放疗新模式。既往研究已经证实大分割全乳放疗可以在不影响疗效和不增加不良反应的前提下,将放疗疗程缩短至3-4周,极大的减轻了患者的时间成本和经济压力,提高放射治疗的性价比。同时,大分割放疗治疗计划的实施显著减少单个乳腺癌放疗患者对放射治疗设备的占用时间,使有限的设备可以服务于更多的乳腺癌患者,从而使更多的患者有条件从术后放射治疗中获益。

尽管目前指南已将大分割放疗作为全乳放疗的优选推荐,但是对于大分割放疗在联合区域淋巴结照射的乳腺癌术后放疗患者中的疗效和不良反应,目前仍缺乏成熟的大样本前瞻性随机对照临床研究数据。近年来,有关区域淋巴结预防性照射和内乳淋巴结放疗的获

版本号: Version 1.4, 2021-01-04

益和不良反应受到越来越多的关注。随着 2015 年有关乳腺癌术后区域淋巴结放疗（包含内乳淋巴结）的三项大型 III 期临床研究试验结果的公布，包含内乳淋巴结的区域淋巴结放疗在乳腺癌术后放疗中的地位得到了进一步确立。但是，目前已报道和已注册在研的联合区域淋巴结大分割放疗研究的研究设计中，区域淋巴结放疗范围都仅包含同侧锁骨上淋巴结引流区，而将内乳淋巴结引流区排除在外。这主要是因为将内乳淋巴结引流区包括在靶区范围内，可能增加肺组织和心脏组织的辐射剂量，继而带来放射性肺损伤和心脏损伤增加风险。本课题申请人陈佳艺教授所指导博士研究生的研究证实，瑞金医院放疗科通过多年临床实践，应用一体化 IMRT 技术，已经可以实现在照射内乳淋巴引流区的同时，不明显增加心肺正常组织剂量。因此，本中心可以在一体化 IMRT 技术应用下，在保证安全的前提下，对包含内乳淋巴结的联合区域淋巴结照射大分割放疗进行探索，以期给患者带来更大潜在获益。

希望通过开展此项前瞻性 III 期随机对照临床研究，探讨应用一体化 IMRT 技术模式下联合区域淋巴结（包含内乳淋巴结）大分割放疗与常规分割放疗在乳腺癌术后患者中的疗效和毒副反应，为大分割放疗治疗有区域淋巴结（包含内乳淋巴结）放疗指征的乳腺癌术后患者中的应用提供高级别的循证医学证据，从而填补目前乳腺癌放射治疗相关指南的空白。

本研究将在国内多个研究中心（三级甲等医院）进行，预计共有 801 名受试者参加。

## 二、哪些人不宜参加研究

您若有下列情况则不适合参加本研究：

- 1) 经病理证实的同侧锁骨上淋巴结阳性患者
- 2) 经病理或者影像学证实的同侧内乳淋巴结转移患者
- 3) 妊娠期或哺乳期女性
- 4) 有严重的非肿瘤性内科合并症，影响放疗实施
- 5) 既往 5 年内有恶性肿瘤病史（不包括既往小叶原位癌，皮肤基底细胞癌、皮肤原位癌及宫颈原位癌）
- 6) 同时性对侧乳腺癌
- 7) 既往颈部、胸部或者同侧腋窝放疗史
- 8) 有活动性胶原血管病
- 9) 病理或者影像学证实的远隔部位转移
- 10) 原发肿块分期为 T4 的患者
- 11) 不能在乳腺癌根治手术后（乳房保留手术或者乳房切除手术）12 周内（或距辅助化疗结束 8 周内）开始放疗
- 12) 其他审查员从登记研究中认为有充分理由是不合格的情况：如有潜在的与临床方案不符的情况等；不能或不愿意签署知情同意书；经医疗机构出具的精神疾病患者或者不能配合治疗患者。

## 三、如果参加研究将需要做以下工作：

在您入选研究前，您将接受以下检查以确定您是否可以参加研究：

- 1) 医生将询问、记录您的病史，对您进行体格检查。

版本号: Version 1.4, 2021-01-04

- 2) 您需要做胸部 CT、乳腺钼靶、乳腺腋窝锁骨区淋巴结超声、腹部超声、心电图、心脏超声等检查。

您是合格的纳入者,您可自愿参加研究,签署知情同意书;如您不愿参加研究,我们将按您的意愿施治。

若您自愿参加研究,将进行随机分组,并根据分组结果接受相应方案的术后放疗,具体如下:

Arm A, 大分割组放射治疗,具体如下:

1. 所有患者的乳腺癌术后辅助放疗均通过一体化 IMRT 技术实施。
2. 分割剂量实现方式:
  - 1) 乳房切除术后患者:靶区范围包括同侧胸壁+锁骨上下区+内乳区,处方剂量:40Gy/15次,2.67Gy/次/天,每周5次,3周完成
  - 2) 乳房保留术后患者:靶区范围包括同侧全乳+锁骨上下区+内乳区,处方剂量:40Gy/15次,2.67Gy/次/天,每周5次,3周完成;序贯局部瘤床加量,10.68Gy/4次,2.67Gy/次/天,每周5次,1周完成

Arm B: 常规分割组放射治疗,具体如下:

1. 所有患者的乳腺癌术后辅助放疗均通过一体化 IMRT 技术实施。
2. 分割剂量实现方式:
  - 1) 乳房切除术后患者:靶区范围包括同侧胸壁+锁骨上下区+内乳区,处方剂量:50Gy/25次,2Gy/次/天,每周5次,5周完成
  - 2) 乳房保留术后患者:靶区范围包括同侧全乳+锁骨上下区+内乳区,处方剂量:50Gy/25次,2Gy/次/天,每周5次,5周完成;序贯局部瘤床加量,10Gy/5次,2Gy/次/天,每周5次,1周完成

两组患者在放疗前、放疗期间及放疗结束后都将接受放疗医师安排的疗效及不良反应评估,随访项目及间隔如下:

- 1) 随访项目:体格检查、胸部 CT、乳腺钼靶、乳腺和区域淋巴结超声、腹部超声、心电图、心脏超声、乳房美容效果评估、生活质量量表问卷
- 2) 随访间隔:放疗开始前进行基线检查;放疗结束后4周;放疗结束后2年内,每6个月一次;放疗结束2年后,每12个月一次。随访医师将根据指南及本研究方案要求安排患者进行相关随访项目。

研究对象需要根据随机分组情况接受相应分割方案的放射治疗,并且按照研究方案设计的随访时间点在接受相应项目的随访,期间需要接受生活质量量表问卷评估。

#### 四、参加研究可能的受益

若您随机至常规分割放疗组将接受标准术后放射治疗,本研究有规范的靶区及正常组织勾画指南图谱以及严格的正常组织剂量限制的保障。因此,可以得到更有安全保障的术后放射治疗。若您随机至大分割组,放疗疗程将缩短至3-4周,这将极大降低您整个治疗过程的时间成本、治疗负担和护理费用,减少放射治疗对您本人及家庭的工作和生活影响。本研究所有入组患者的放射治疗将采用一体化 IMRT 技术。IMRT 技术是前沿的精准放疗技术,与传统放疗技术相比较,IMRT 技术具有放射剂量控制的明显优势,所有参加本研究的均可在 IMRT 这种前沿技术保障下,得到更加安全有效的治疗。同时通过本研究得到的有关研究信息将有益于您及其他患者,推动相关研究的发展。

#### 五、参加研究可能的不良反应、风险和不适、不方便

本研究无侵入性操作,入组条件基于现有的国际标准,无额外风险。但抗肿瘤标准治疗可带来相关风险,本研究中所有患者均需按照规范接受放射治疗,已知的潜在风险

版本号: Version 1.4, 2021-01-04

为乳腺癌放射治疗相关的急性和晚期放射性损伤, 主要包括: 皮肤损伤、胸壁或者乳房疼痛、肺损伤、心脏损伤、上肢水肿、上肢活动功能障碍、臂丛损伤、乳房外形改变等。潜在风险为大分割的剂量分割模式的疗效和安全性尚未在乳腺癌术后区域淋巴结放疗中得到大型临床研究证实, 因此该剂量分割模式在理论上存在增加放射性损伤和复发风险的可能。如果出现上述急性和晚期放射性损伤, 我们将根据最新国际诊疗指南进行相应处理。

如果在研究期间您出现任何不适, 或病情发生新的变化, 或任何意外情况, 不管是否与研究有关, 均应及时通知您的医生, 他/她将对此作出判断并给予适当的医疗处理。

## 六、有关费用

本研究应用的IMRT技术已在国内实践多年, 相关检查也是临床应用多年的常规检查, 相关诊疗和复查费用需要您自行承担。

考虑到目前技术条件下, 真实世界的临床实践中乳腺癌放疗相关轻-中度不良反应常见, 因此对于轻-中度放疗不良反应及不适不进行经济补偿, 但可提供临床诊疗协助。

如在临床研究中出现严重不良反应, 被证实确实与临床研究干预有关, 我们将按照我国相关法律法规的规定, 对于研究相关损害的诊断治疗提供协助和一定经济补偿。

## 七、个人信息的保密

您的医疗记录(研究病历/CRF、化验单等)将完整地保存在您所就诊的医院。医生会将化验和其它检查结果记录在您的病历上。研究者、伦理委员会和药品监督管理部门将被允许查阅您的医疗记录。任何有关本项研究结果的公开报告将不会披露您的个人身份。我们将在法律允许的范围内, 尽一切努力保护您个人医疗资料的隐私。

按照医学研究伦理, 除了个人隐私信息外, 试验数据将可供公众查询和共享, 查询和共享将只限于基于网络的电子数据库, 保证不会泄漏任何个人隐私信息。

## 八、怎样获得更多的信息?

您可以在任何时间提出有关本项研究的任何问题, 并得到相应的解答。如果在研究过程中有任何重要的新信息, 可能影响您继续参加研究的意愿时, 您的医生将会及时通知您。

## 九、可以自愿选择参加研究和中途退出研究

是否参加研究完全取决于您的意愿。您可以拒绝参加此项研究, 或在研究过程中的任何时间退出本研究, 这都不会影响您和医生间的关系, 都不会影响对您的医疗或有其他方面利益的损失。如果您选择不参加本研究, 根据NCCN指南(2020 V1版), 将给予您同本研究常规分割组相同的放射治疗方案, 具体如下: 1) 乳房切除术后患者: 靶区范围包括同侧胸壁+锁骨上下区+内乳区, 处方剂量: 50Gy/25次, 2Gy/次/天, 每周5次, 5周完成; 2) 乳房保留术后患者: 靶区范围包括同侧全乳+锁骨上下区+内乳区, 处方剂量: 50Gy/25次, 2Gy/次/天, 每周5次, 5周完成; 序贯局部瘤床加量, 10Gy/5次, 2Gy/次/天, 每周5次, 1周完成。

出于对您的最大利益考虑, 医生或研究者可能会在研究过程中随时中止您继续参加本研究。

如果您因为任何原因从研究中退出, 您可能被询问有关您使用相关治疗的情况。如果医生认为需要, 您也可能被要求进行实验室检查和体格检查。

## 十、现在该做什么?

是否参加本项研究由您自己(和您的家人)决定。在您做出参加研究的决定前, 请尽可能向您的医生询问有关问题。

版本号: Version 1.4, 2021-01-04

感谢您阅读以上材料。如果您决定参加本项研究,请告诉您的医生,他/她会为您安排一切有关研究的事务。请您保留这份资料。

## 知情同意书. 同意签字页

**临床研究项目名称:**乳腺癌术后区域淋巴结大分割对比常规分割一体化 IMRT 的多中心、随机对照 III 期临床研究

**课题承担单位:**上海交通大学医学院附属瑞金医院

**课题协作单位:**上海交通大学医学院附属仁济医院; 上海市第十人民医院; 上海交通大学医学院附属第九人民医院; 复旦大学附属中山医院; 中山大学孙逸仙纪念医院; 无锡市第四人民医院; 中国科学院大学附属肿瘤医院(浙江省肿瘤医院); 南通市肿瘤医院。

### 同意声明

我已经阅读了上述有关本研究的介绍,而且有机会就此项研究与医生讨论并提出问题。我提出的所有问题都得到了满意的答复。

我知道参加本研究可能产生的风险和受益。我知晓参加研究是自愿的,我确认已有充足时间对此进行考虑,而且明白:

- 1、我可以随时向医生咨询更多的信息。
- 2、我可以随时退出本研究,而不会受到歧视或报复,医疗待遇与权益不会受到影响。
- 3、我同样清楚,如果我中途退出研究,特别是由于药物的原因使我退出研究时,我若将我的病情变化告诉医生,完成相应的体格检查和理化检查,这将对整个研究十分有利。
- 4、如果因病情变化我需要采取任何其他药物治疗,我会在事先征求医生的意见,或在事后如实告诉医生。
- 5、我同意相关部门伦理委员会或申办者代表查阅我的研究资料。
- 6、我将获得一份经过签名并注明日期的知情同意书副本。
- 7、最后,我决定同意参加本项研究,并保证尽量遵从医嘱。

患者签名: \_\_\_\_\_ 年 \_\_\_\_ 月 \_\_\_\_ 日

联系电话: \_\_\_\_\_

我确认已向患者解释了本试验的详细情况,包括其权力以及可能的受益和风险,并给其一份签署过的知情同意书副本。

医生签名: \_\_\_\_\_ 年 \_\_\_\_ 月 \_\_\_\_ 日

医生的工作电话: \_\_\_\_\_

(注: 如果受试者无行为能力时则需法定代理人签名)
